# Supplementary material
Source: publisher site journal article supplement (https://www.dovepress.com/get_supplementary_file.php?f=475481.docx)
Supplement: Supplementary file 1 [file get_supplementary_file.php]

Fig. S1 Schematic representation of the basic assumptions of MR studies


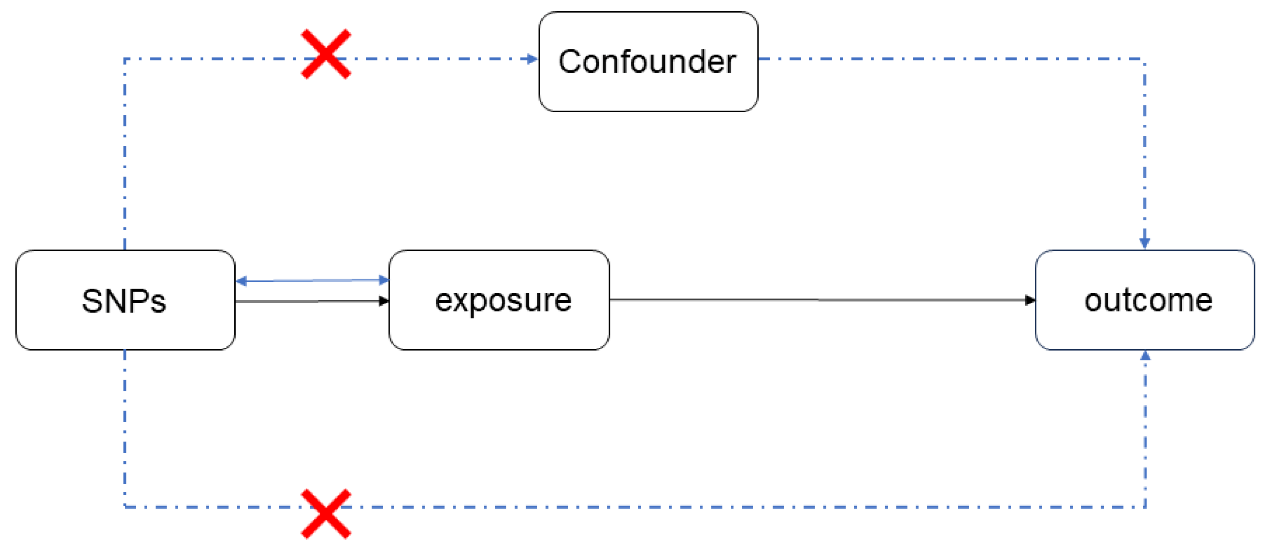


Fig. S2 Analysis of the inverse causal association between COPD and CVD


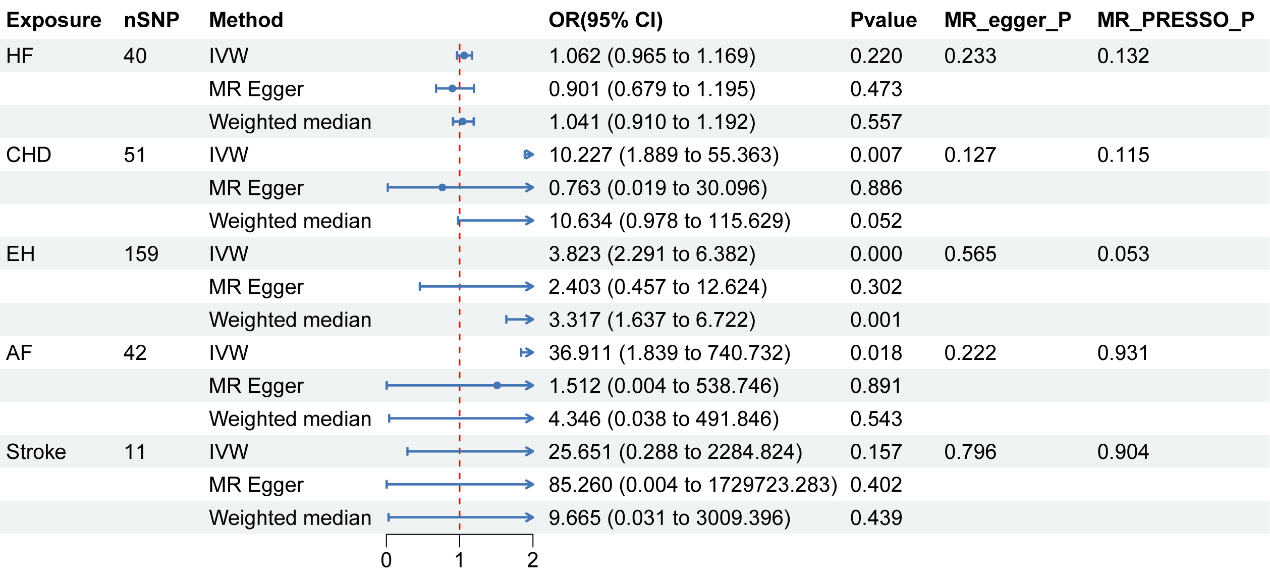


Fig. S3 Validation analysis of the causal association between COPD and CVD


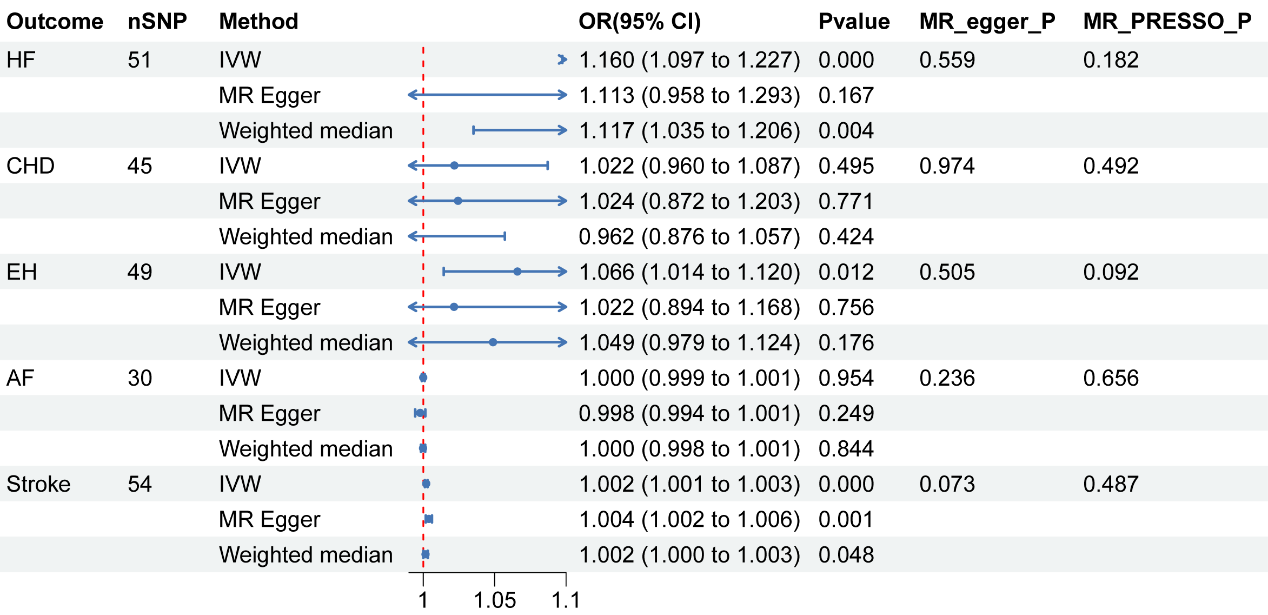


Table S1. Heterogeneity testing using the Cochran’s Q statistic

| Outcomes | Methods | Q | df | *P* value |
| --- | --- | --- | --- | --- |
| HF | MR Egger | 58.780610 | 40 | 0.027973 |
|  | IVW | 58.830144 | 41 | 0.035084 |
| CHD | MR Egger | 62.07231 | 49 | 0.099474 |
|  | IVW | 62.31008 | 50 | 0.113551 |
| EH | MR Egger | 51.7281 | 37 | 0.054605 |
|  | IVW | 52.1125 | 38 | 0.063318 |
| AF | MR Egger | 48.28414 | 52 | 0.620808 |
|  | IVW | 48.8108 | 53 | 0.637914 |
| Stroke | MR Egger | 44.33044 | 51 | 0.73394 |
|  | IVW | 46.50171 | 52 | 0.689133 |
